# Supplementary material
Source: publisher site journal article supplement (https://www.spandidos-publications.com/4204/downloadSupplementary)

**A** *TP53* sgRNA #1

INDEL CONTRIBUTION ▾ SEQUENCE

-30 40% G C C C C T G C A C - - - - - C A G C C C C C T C C T G G C C C C T G T C A T C T

+2 10% G C C C C T G C A C C A G C A G T C C T T A C A C N N C G G C G G C C C C T G C A C C A G C C C C C T C C T G G C C C C T G T C A T C

0 9% G C C C C T G C A C C A G C A G T C C T T A C A C C G G C G G C C C C T G C A C C A G C C C C C T C C T G G C C C C T G T C A T C T

+1 8% G C C C C T G C A C C A G C A G T C C T T A C A C N C G G C G G C C C C T G C A C C A G C C C C C T C C T G G C C C C T G T C A T C T

-1 7% G C C C C T G C A C C A G C A G T C C T T A C A C - G G C G G C C C C T G C A C C A G C C C C C T C C T G G C C C C T G T C A T C T

+4 5% G C C C C T G C A C C A G C A G T C C T T A C A C N N N N C G G C G G C C C C T G C A C C A G C C C C C T C C T G G C C C C T G T C A

+3 5% G C C C C T G C A C C A G C A G T C C T T A C A C N N N C G G C G G C C C C T G C A C C A G C C C C C T C C T G G C C C C T G T C A T

+13 2% G C C C C T G C A C C A G C A G T C C T T A C A C N N N N N N N N N N N N N N N N C G G C G G C C C C T G C A C C A G C C C C C T C C T G G

-15 2% G C C C C T G C A C C A G C A G T C C T - - - - - G C A C C A G C C C C C T C C T G G C C C C T G T C A T C T

C C C C T G C A C C A G C M S C T C C T A G G C C C C K G K C C C C T T C K G C C C C T T C C C C A A A

130 135 140 145 150 155 160 165 170 175

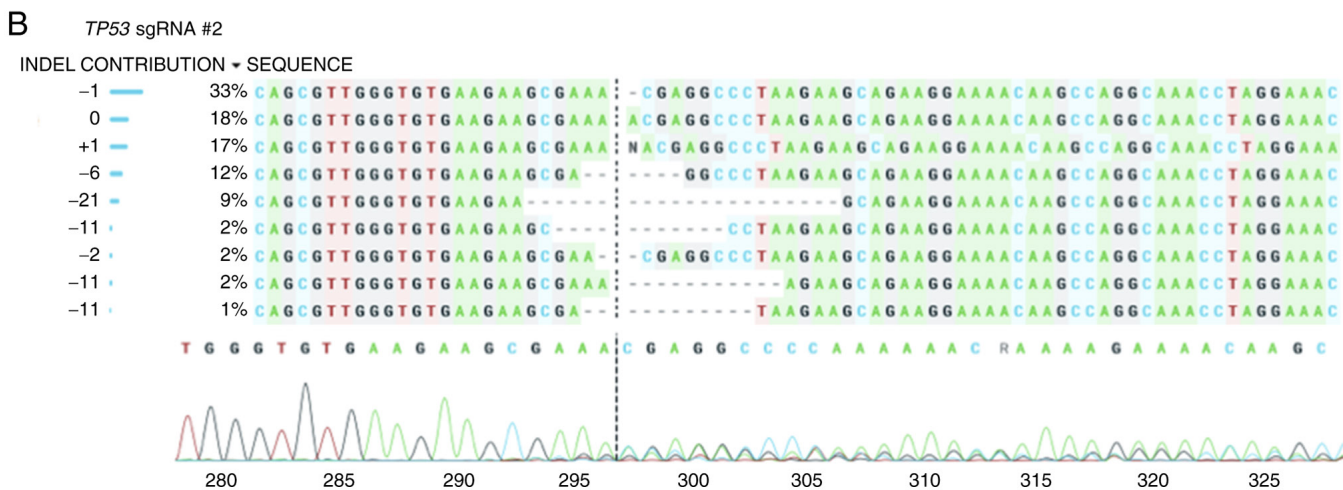

Supplement: Supplementary file 1 [file downloadSupplementary]
